# Supplementary material for: Genomics4RD: An integrated platform to share Canadian deep‐phenotype and multiomic data for international rare disease gene discovery
Source: PubMed Central journal article supplement — Hum Mutat. 2022 Mar 9;43(6):800–11. doi: 10.1002/humu.24354 (PMC9311832; doi:10.1002/humu.24354), 2022-03-09
Supplement: HUMU-43-800-s001.pdf [file HUMU-43-800-s001.pdf]

# Supporting Figures

a)

**P0000030** Care Pathways Pre Test Care Pathways Post Test

Reported by Administrator on 2019/03/18 17:21 · Last modified by Hannah Driver on 2022/01/26 00:35

This record is owned by Administrator and is private. It is shared with Phase 1 admins and 6 other collaborators

This patient is part of: Unsolved GWS Case enrolled in Care Pathways (Phases 1 and 2)

### Patient consent(s)

SOLVE Phase 1 Optional (SCH)

### Patient information

Identifier: TEST123  
 G4RD Family ID (Project ID): FAM0000044 (Test ID)

Life status: Alive  
 Date of birth: 2018-03  
 Sex: Female

Indication for referral:  
 Hereditary Spastic Paraplegia

### Family history and pedigree

FAM0000044 (Test ID)

Family members:  
 • TEST123 (2018-03)

Paternal ethnicity: 1. Iranian  
 Maternal ethnicity: 1. Scottish

b)

### Measurements

|                     |            |                                   |
|---------------------|------------|-----------------------------------|
| Date:               | 05/29/2019 |                                   |
| Age:                | 1y 2m      |                                   |
| Weight:             | 60.0 kg    | 100 <sup>th</sup> pctl (+12.09SD) |
| Height:             | 190.0 cm   | 100 <sup>th</sup> pctl (+41.17SD) |
| BMI:                | 16.62      | 64 <sup>th</sup> pctl (+0.35SD)   |
| Arm span:           | 80.0 cm    | = Height - 110.0 cm               |
| Date:               | 01/28/2020 |                                   |
| Age:                | 1y 10m     |                                   |
| Weight:             | 65.0 kg    | 100 <sup>th</sup> pctl (+11.11SD) |
| Height:             | 185.0 cm   | 100 <sup>th</sup> pctl (+31.45SD) |
| BMI:                | 18.99      | 99 <sup>th</sup> pctl (+2.25SD)   |
| Head circumference: | 55.0 cm    | 100 <sup>th</sup> pctl (+5.69SD)  |
| Date:               | 04/14/2020 |                                   |
| Age:                | 2y 1m      |                                   |
| Weight:             | 55.0 kg    | 100 <sup>th</sup> pctl (+9.94SD)  |
| Height:             | 180.0 cm   | 100 <sup>th</sup> pctl (+28.17SD) |
| BMI:                | 16.98      | 82 <sup>nd</sup> pctl (+0.93SD)   |
| Head circumference: | 50.0 cm    | 92 <sup>nd</sup> pctl (+1.42SD)   |
| Date:               | 05/21/2020 |                                   |
| Age:                | 2y 2m      |                                   |
| Weight:             | 54.0 kg    | 100 <sup>th</sup> pctl (+9.68SD)  |
| Height:             | 170.0 cm   | 100 <sup>th</sup> pctl (+24.37SD) |
| BMI:                | 18.69      | 98 <sup>th</sup> pctl (+2.01SD)   |
| Head circumference: | 52.0 cm    | 100 <sup>th</sup> pctl (+2.91SD)  |

c)

### GROWTH CHARTS

**Clinical symptoms and physical findings**

**GROWTH PARAMETERS**  
 Weight for age  
 Increased body weight (>+2SD)  
 Stature for age  
 Tall stature (>+2SD)

**EYE DEFECTS**  
 Coloboma  
 ★ Lens coloboma  
 Childhood onset

**EAR DEFECTS**  
 ★ Preauricular pit

**CUTANEOUS**  
 ★ Hypopigmentation of the skin  
 ★ Generalized hypopigmentation

**RESPIRATORY**  
 Congenital diaphragmatic hernia  
 NO Abnormal lung morphology

**BEHAVIOR, COGNITION AND DEVELOPMENT**  
 Delayed gross motor development  
 Delayed speech and language development  
 Autism  
 Behavioral abnormality

d)

### Genotype information

**LIST OF GENES**

| GENE    | STATUS           | STRATEGY | COMMENTS |
|---------|------------------|----------|----------|
| 1 SRCAP | Candidate        |          |          |
| 2 PSMB6 | Confirmed causal |          |          |

▼ SUGGESTED GENES

Click on links below (extracted from the phenotypic description) to disable or re-enable their contribution in the gene search results.

Tall stature<sup>(194)</sup> Coloboma<sup>(200)</sup> Behavioral abnormality<sup>(2250)</sup> Autism<sup>(196)</sup> Delayed speech and language development<sup>(696)</sup> Congenital diaphragmatic hernia<sup>(102)</sup> Hypopigmentation of the skin<sup>(231)</sup> Delayed gross motor development<sup>(196)</sup> Increased body weight<sup>(529)</sup> Preauricular pit<sup>(67)</sup> Generalized hypopigmentation<sup>(50)</sup> Lens coloboma<sup>(1)</sup>

Download  Exclude Tested Negative And Rejected Candidate Genes

Results 1 - 10 out of 2157, per page of 10 Page 1 2 3 4 5 6 7 8 9 10 ... 216

| Matching genes | Associated phenotypes                                                                                                                                                                       |
|----------------|---------------------------------------------------------------------------------------------------------------------------------------------------------------------------------------------|
| PTEN           | Autism; Behavioral abnormality; Coloboma; Delayed gross motor development; Hypopigmentation of the skin; Increased body weight; Tall stature                                                |
| HERC2          | Autism; Behavioral abnormality; Delayed gross motor development; Delayed speech and language development; Generalized hypopigmentation; Hypopigmentation of the skin; Increased body weight |
| MAGEL2         | Autism; Behavioral abnormality; Delayed gross motor development; Delayed speech and language development; Generalized hypopigmentation; Hypopigmentation of the skin; Increased body weight |
| NIPBL          | Autism; Behavioral abnormality; Coloboma; Congenital diaphragmatic hernia; Delayed speech and language development; Increased body weight                                                   |
| SH2B1          | Autism; Behavioral abnormality; Coloboma; Congenital diaphragmatic hernia; Delayed speech and language development; Increased body weight                                                   |
| SIN3A          | Autism; Behavioral abnormality; Coloboma; Congenital diaphragmatic hernia; Delayed speech and language development; Increased body weight                                                   |
| EP300          | Autism; Behavioral abnormality; Coloboma; Delayed gross motor development; Delayed speech and language development; Increased body weight                                                   |
| ATP6V1A        | Autism; Behavioral abnormality; Coloboma; Delayed gross motor development; Delayed speech and language development; Tall stature                                                            |
| RERE           | Autism; Behavioral abnormality; Coloboma; Delayed speech and language development; Increased body weight; Tall stature                                                                      |
| AKT1           | Autism; Behavioral abnormality; Coloboma; Hypopigmentation of the skin; Increased body weight; Tall stature                                                                                 |

Results 1 - 10 out of 2157 Page 1 2 3 4 5 6 7 8 9 10 ... 216

### Diagnosis

|                           |                               |
|---------------------------|-------------------------------|
| Clinical diagnosis (ORDO) | 1661 X-linked corneal dermoid |
| Final diagnosis (OMIM)    | 425508 HAIRY EARS, Y-LINKED   |

**Supp. Figure S1a-d. Genomics4RD records.** Genomics4RD records can store and display a breadth of participant information, including, but not limited to: a) participant consent types, coded participant demographic information, family history and pedigrees; b) clinical measurements; c) growth charts, clinical symptoms and physical findings (using HPO terms, starred for relevance); and d) genotype information, suggested candidate genes based on HPO-gene associations, and diagnoses. The Care Pathway modules are available as separate forms, accessible at the top of participant records enrolled in the study (see a).

Quick Filters

GnomAD MAF < 1 %   GnomAD MAF < .5 %   Het.   Hom.

27/27 columns visible, 1 active filter, 2 columns sorted

Manage columns   Manage filters

| ↕ Patient count | ↕ Global AF     | ↕ GnomAD MAF | ↑ Ref... | ↕ Rs ID     | 1 ▼ Chro... | 2 ▼ Start Position | ↕ Stop Position | ↕ Reference Allele | ↕ Alternate Allele | Zygoty         | ↕ Type       |
|-----------------|-----------------|--------------|----------|-------------|-------------|--------------------|-----------------|--------------------|--------------------|----------------|--------------|
| 2               | *** 0.05263158  |              | GRCh38   |             | 10          | 116715             | 116716          | TGCAGT             | -                  | 2 entries ***  | deletion     |
| 2               | *** 0.05263158  |              | GRCh38   |             | 10          | 116708             | 116709          | -                  | AC                 | 2 entries ***  | insertion    |
| 4               | *** 0.10526316  | 0.487668     | GRCh38   | rs4537687   | 10          | 116433             | 116433          | C                  | A                  | 4 entries ***  | substitution |
| 1               | *** 0.02631579  | 0.063337     | GRCh38   | rs189357902 | 10          | 116256             | 116256          | G                  | T                  | heterozygous   | substitution |
| 14              | *** 0.42105263  | 0.74238      | GRCh38   | rs796072128 | 10          | 116217             | 116220          | TTTT               | -                  | 14 entries *** | deletion     |
| 10              | *** 0.2631579   | 0.194534     | GRCh38   | rs3866489   | 10          | 115743             | 115743          | G                  | A                  | 10 entries *** | substitution |
| 3               | *** 0.078947365 | 0.113645     | GRCh38   | rs3954302   | 10          | 115625             | 115625          | G                  | A                  | 3 entries ***  | substitution |
| 4               | *** 0.10526316  | 0.200323     | GRCh38   | rs2379055   | 10          | 114926             | 114926          | G                  | A                  | 4 entries ***  | substitution |
| 3               | *** 0.078947365 | 0.049473     | GRCh38   | rs10904505  | 10          | 114308             | 114308          | T                  | C                  | 3 entries ***  | substitution |
| 12              | *** 0.31578946  | 0.252945     | GRCh38   | rs10904494  | 10          | 113934             | 113934          | A                  | C                  | 12 entries *** | substitution |
| 14              | *** 0.7105263   |              | GRCh38   | rs782639415 | 10          | 113094             | 113094          | T                  | -                  | 14 entries *** | deletion     |
| 10              | *** 0.2631579   | 0.025956     | GRCh38   | rs146514023 | 10          | 111990             | 111990          | A                  | G                  | 10 entries *** | substitution |
| 1               | *** 0.02631579  | 0.063445     | GRCh38   | rs7909677   | 10          | 111955             | 111955          | A                  | G                  | heterozygous   | substitution |
| 1               | *** 0.02631579  | 0.069533     | GRCh38   | rs7923210   | 10          | 111613             | 111613          | C                  | T                  | heterozygous   | substitution |

**Supp. Figure S2. Genomics4RD variant store.** The variant store aggregates variants across participants in Genomics4RD. Data depositors can multi-filter the store based on variant annotations, zygoty, and counts across participants.
